# Supplementary material for: Development and multicenter performance evaluation of fully automated SARS-CoV-2 IgM and IgG immunoassays
Source: publisher site journal article supplement (doi:10.1515/cclm-2020-0548), 2020-07-15
Supplement: Supplementary file 1 [file j_cclm-2020-0548_suppl.docx]

**Table S1:** **Repeatability and within-laboratory precision of SARS-CoV-2 IgM**

|  |  | Repeatability | | Within-Laboratory | |
| --- | --- | --- | --- | --- | --- |
| Sample | Mean, kAU/L | SD, kAU/L | CV, % | SD, kAU/L | CV, % |
| Serum 1 | 7.29 | 0.31 | 4.32% | 0.32 | 4.45% |
| Serum 2 | 13.5 | 0.41 | 3.06% | 0.44 | 3.26% |
| Serum 3 | 98.2 | 2.75 | 2.80% | 2.97 | 3.02% |
| Serum 4 | 295 | 8.93 | 3.03% | 9.07 | 3.08% |

**Table S2: Repeatability and within-laboratory precision of SARS-CoV-2 IgG**

|  |  | Repeatability | | Within-Laboratory | |
| --- | --- | --- | --- | --- | --- |
| Sample | Mean, kAU/L | SD, kAU/L | CV, % | SD, kAU/L | CV, % |
| Serum 1 | 7.44 | 0.32 | 4.30% | 0.32 | 4.30% |
| Serum 2 | 13.6 | 0.42 | 3.11% | 0.42 | 3.12% |
| Serum 3 | 77.8 | 2.54 | 3.26% | 3.99 | 5.13% |
